# Supplementary material for: Effect of Different Anchorage Reinforcement Methods on Long-Term Maxillary Whole Arch Distalization with Clear Aligner: A 4D Finite Element Study with Staging Simulation
Source: MDPI journal article supplement (doi:10.3390/bioengineering11010003), 2023-12-20
Supplement: s1 [file s1]

**Table S1.** Three-dimensional displacement (mm) of the crown points and rotation (°) of the long axis of each tooth during the total arch distalization of the 4 groups. Tooth numbering according to the FDI tooth numbering system. The positive axis was determined by the right-handed rule.

| Group         | Tooth | Direction | Steps | Displacement (mm) |       |       |       |       |       |       | Rotation (° ) |       |       |       |       |       |       |
|---------------|-------|-----------|-------|-------------------|-------|-------|-------|-------|-------|-------|---------------|-------|-------|-------|-------|-------|-------|
|               |       |           |       | 10                | 20    | 30    | 40    | 50    | 60    | 70    | 10            | 20    | 30    | 40    | 50    | 60    | 70    |
| Control group | 1     | X         |       | -0.03             | -0.07 | -0.11 | -0.16 | -0.38 | -0.19 | -0.60 | 1.21          | 4.05  | 7.53  | 9.38  | 10.16 | 6.00  | 0.65  |
|               |       | Y         |       | -0.24             | -0.82 | -1.51 | -1.80 | -2.06 | -1.32 | 0.87  | -0.01         | -0.11 | -0.37 | -0.36 | 0.68  | 0.09  | 2.40  |
|               |       | Z         |       | -0.18             | -0.66 | -1.31 | -1.84 | -2.00 | -1.42 | -1.08 | -0.06         | -0.17 | -0.26 | -0.35 | -0.72 | -0.32 | -0.90 |
|               | 2     | X         |       | -0.02             | -0.07 | -0.10 | -0.34 | -0.50 | -0.38 | -1.23 | 1.03          | 3.63  | 6.70  | 7.50  | 8.48  | 5.01  | -0.97 |
|               |       | Y         |       | -0.23             | -0.76 | -1.38 | -1.61 | -1.85 | -1.24 | 1.03  | -0.01         | -0.06 | -0.24 | 0.88  | 1.68  | 1.24  | 4.01  |
|               |       | Z         |       | -0.15             | -0.53 | -1.04 | -1.23 | -1.24 | -0.80 | -0.42 | -0.07         | -0.23 | -0.37 | -0.83 | -1.18 | -0.82 | -1.55 |
|               | 3     | X         |       | -0.06             | -0.21 | -0.34 | -0.68 | -0.68 | -0.53 | -0.49 | 1.20          | 4.03  | 6.37  | 5.66  | 3.03  | 0.33  | 0.33  |
|               |       | Y         |       | -0.20             | -0.74 | -1.37 | -0.98 | -0.30 | 0.51  | 0.56  | 0.37          | 1.33  | 2.16  | 4.34  | 4.40  | 3.78  | 3.63  |
|               |       | Z         |       | -0.10             | -0.30 | -0.49 | -0.53 | -0.35 | -0.33 | -0.37 | -0.36         | -1.22 | -1.93 | -2.89 | -2.63 | -1.94 | -1.85 |
|               | 4     | X         |       | -0.07             | -0.17 | -0.35 | 0.42  | 0.46  | 0.41  | 0.41  | 1.38          | 3.76  | 5.03  | -0.48 | -4.64 | -4.26 | -4.12 |
|               |       | Y         |       | -0.26             | -0.81 | -1.28 | -0.37 | 0.55  | 0.51  | 0.51  | 0.47          | 1.14  | 1.36  | -2.14 | -2.23 | -1.77 | -1.63 |
|               |       | Z         |       | -0.06             | -0.10 | -0.19 | -0.08 | -0.18 | -0.18 | -0.18 | -0.27         | -0.55 | -0.55 | 1.89  | 1.77  | 1.36  | 1.23  |
|               | 5     | X         |       | -0.10             | -0.19 | -0.04 | 0.94  | 0.87  | 0.83  | 0.82  | 1.28          | 3.35  | 1.11  | 4.85  | 4.77  | 4.59  | 4.47  |
|               |       | Y         |       | -0.26             | -0.83 | -0.01 | 0.72  | 0.72  | 0.71  | 0.70  | 0.59          | 1.14  | 0.26  | -3.36 | -2.77 | -2.46 | -2.31 |
|               |       | Z         |       | -0.05             | -0.10 | -0.09 | -0.20 | -0.21 | -0.21 | -0.20 | -1.06         | -1.47 | -0.88 | 11.12 | 8.88  | 7.70  | 7.12  |
|               | 6     | X         |       | -0.12             | 0.05  | 0.18  | 0.90  | 0.87  | 0.85  | 0.85  | 0.82          | -2.57 | -0.72 | -3.11 | -2.68 | -2.37 | -2.21 |
|               |       | Y         |       | -0.24             | 0.39  | 1.08  | 0.62  | 0.64  | 0.62  | 0.62  | 0.59          | -0.28 | -0.63 | -2.04 | -1.17 | -0.65 | -0.34 |
|               |       | Z         |       | -0.05             | -0.15 | -0.40 | -0.25 | -0.22 | -0.21 | -0.21 | 0.61          | 0.25  | 0.51  | -1.70 | -0.63 | -0.01 | 0.37  |
|               | 7     | X         |       | 0.16              | 0.15  | -0.02 | 0.44  | 0.44  | 0.43  | 0.41  | -5.92         | -8.59 | -5.92 | -4.05 | -4.43 | -4.65 | -4.78 |
|               |       | Y         |       | 0.97              | 1.55  | 1.13  | 0.66  | 0.69  | 0.71  | 0.73  | -1.39         | -1.66 | -0.90 | -2.41 | -2.12 | -1.88 | -1.70 |

|                                                     |   |   |       |       |       |       |       |       |       |       |        |       |       |       |       |       |
|-----------------------------------------------------|---|---|-------|-------|-------|-------|-------|-------|-------|-------|--------|-------|-------|-------|-------|-------|
|                                                     |   | Z | -0.37 | -0.66 | -0.64 | -0.68 | -0.70 | -0.70 | -0.69 | 0.03  | 0.23   | 0.24  | -0.59 | -0.45 | -0.35 | -0.27 |
| Buccal<br>temporary<br>anchorage<br>device<br>group | 1 | X | -0.02 | -0.04 | -0.06 | -0.07 | -0.25 | -0.05 | -0.49 | 1.08  | 2.96   | 5.96  | 8.24  | 9.30  | 4.88  | 1.90  |
|                                                     |   | Y | -0.12 | -0.62 | -1.14 | -1.27 | -1.64 | -0.81 | 1.71  | -0.02 | -0.20  | -0.47 | -0.80 | 0.01  | -0.39 | 1.80  |
|                                                     |   | Z | -0.22 | -0.73 | -1.35 | -1.98 | -2.14 | -1.46 | -1.80 | -0.04 | -0.07  | -0.13 | -0.13 | -0.45 | -0.08 | -0.60 |
|                                                     | 2 | X | -0.00 | -0.02 | -0.03 | -0.31 | -0.44 | -0.27 | -1.15 | 0.94  | 2.88   | 5.38  | 6.67  | 7.74  | 3.50  | -1.73 |
|                                                     |   | Y | -0.12 | -0.62 | -1.01 | -1.14 | -1.50 | -0.68 | 1.84  | -0.17 | -0.28  | -0.57 | 0.35  | 0.92  | 0.98  | 3.12  |
|                                                     |   | Z | -0.19 | -0.59 | -1.06 | -1.30 | -1.41 | -0.94 | -0.95 | 0.01  | -0.08  | -0.14 | -0.56 | -0.84 | -0.59 | -1.04 |
|                                                     | 3 | X | -0.02 | -0.10 | -0.22 | -0.47 | -0.54 | -0.48 | -0.46 | 0.72  | 2.59   | 5.13  | 4.85  | 2.55  | -0.39 | -0.20 |
|                                                     |   | Y | -0.07 | -0.49 | -0.86 | -0.67 | -0.02 | 1.02  | 1.04  | -0.02 | 0.42   | 1.25  | 2.81  | 3.15  | 2.86  | 2.75  |
|                                                     |   | Z | -0.12 | -0.31 | -0.54 | -0.48 | -0.38 | -0.50 | -0.51 | -0.07 | -0.54  | -1.26 | -1.98 | -1.84 | -1.21 | -1.14 |
|                                                     | 4 | X | -0.02 | -0.09 | -0.22 | 0.50  | 0.56  | 0.51  | 0.51  | 0.84  | 2.11   | 3.24  | -1.88 | -5.79 | -5.15 | -4.87 |
|                                                     |   | Y | -0.14 | -0.59 | -0.98 | -0.06 | 0.82  | 0.75  | 0.73  | 0.23  | 0.66   | 0.95  | -2.13 | -1.91 | -1.30 | -1.04 |
|                                                     |   | Z | -0.04 | -0.08 | -0.13 | -0.11 | -0.24 | -0.22 | -0.22 | -0.12 | -0.34  | -0.43 | 1.79  | 1.38  | 0.82  | 0.57  |
|                                                     | 5 | X | -0.04 | -0.12 | 0.02  | 0.66  | 0.60  | 0.57  | 0.57  | 0.74  | 1.62   | -1.59 | 1.18  | 1.06  | 1.05  | 0.84  |
|                                                     |   | Y | -0.14 | -0.62 | 0.45  | 1.07  | 1.06  | 1.05  | 1.02  | 0.30  | 0.83   | -0.28 | -3.50 | -3.15 | -2.90 | -2.51 |
|                                                     |   | Z | -0.04 | -0.07 | -0.15 | -0.25 | -0.26 | -0.28 | -0.29 | -0.53 | -1.43  | -0.27 | 12.84 | 11.22 | 10.10 | 8.29  |
|                                                     | 6 | X | -0.06 | 0.12  | 0.17  | 0.74  | 0.72  | 0.70  | 0.70  | 0.39  | -2.40  | -2.02 | -3.38 | -3.48 | -3.20 | -3.05 |
|                                                     |   | Y | -0.14 | 0.57  | 1.16  | 0.92  | 0.93  | 0.92  | 0.92  | 0.34  | -0.30  | -0.52 | -2.09 | -1.26 | -0.78 | -0.55 |
|                                                     |   | Z | -0.04 | -0.20 | -0.37 | -0.30 | -0.26 | -0.24 | -0.24 | 0.37  | 0.23   | 0.62  | -1.48 | -0.50 | 0.06  | 0.33  |
|                                                     | 7 | X | 0.19  | 0.14  | -0.11 | 0.39  | 0.41  | 0.40  | 0.38  | -6.63 | -10.25 | -7.31 | -6.11 | -.33  | -6.50 | -6.64 |
|                                                     |   | Y | 1.09  | 1.87  | 1.42  | 1.11  | 1.12  | 1.13  | 1.14  | -1.63 | -1.84  | -0.40 | -2.20 | -2.02 | -1.81 | -1.63 |
|                                                     |   | Z | -0.42 | -0.79 | -0.75 | -0.78 | -0.80 | -0.80 | -0.79 | 0.01  | 0.31   | 0.54  | -0.29 | -0.22 | -0.13 | -0.05 |
| Palatal<br>temporary<br>anchorage                   | 1 | X | -0.02 | -0.06 | -0.09 | -0.10 | -0.49 | -0.49 | -0.88 | 0.44  | 2.55   | 5.63  | 5.65  | 6.00  | 1.12  | -6.00 |
|                                                     |   | Y | -0.04 | -0.48 | -1.09 | -1.20 | -1.39 | -0.50 | 1.88  | 0.04  | -0.01  | -0.18 | -0.07 | 1.72  | 1.98  | 4.00  |
|                                                     |   | Z | -0.05 | -0.39 | -0.96 | -1.17 | -1.21 | -0.49 | 0.31  | -0.04 | -0.13  | -0.22 | -0.26 | -0.88 | -0.79 | -1.40 |
|                                                     | 2 | X | -0.01 | -0.05 | -0.10 | -0.29 | -0.56 | -0.49 | -1.42 | 0.42  | 2.38   | 5.01  | 4.31  | 4.80  | 0.01  | -7.16 |

|                              |   |   |       |       |       |       |       |       |       |       |        |       |       |       |       |       |
|------------------------------|---|---|-------|-------|-------|-------|-------|-------|-------|-------|--------|-------|-------|-------|-------|-------|
| device<br>group              |   | Y | -0.06 | -0.46 | -1.04 | -0.88 | -1.12 | -0.22 | 2.26  | -0.02 | -0.04  | 0.01  | 0.97  | 2.19  | 2.63  | 5.25  |
|                              |   | Z | -0.05 | -0.34 | -0.78 | -0.72 | -0.66 | -0.06 | 0.62  | -0.02 | -0.15  | -0.35 | -0.67 | -1.17 | -1.11 | -1.94 |
|                              | 3 | X | -0.01 | -0.10 | -0.23 | -0.44 | -0.55 | -0.55 | -0.50 | 0.39  | 2.38   | 4.75  | 3.11  | -0.57 | -4.95 | -4.88 |
|                              |   | Y | -0.05 | -0.49 | -1.04 | -0.77 | -0.02 | 1.16  | 1.23  | 0.04  | 0.53   | 1.54  | 2.91  | 3.66  | 3.63  | 3.38  |
|                              | 4 | Z | -0.05 | -0.18 | -0.37 | -0.11 | 0.27  | 0.38  | 0.30  | -0.08 | -0.61  | -1.45 | -1.98 | -2.00 | -1.45 | -1.28 |
|                              |   | X | -0.01 | -0.05 | -0.21 | 0.66  | 0.64  | 0.56  | 0.56  | 0.64  | 2.68   | 4.00  | -2.20 | -6.31 | -5.59 | -5.42 |
|                              |   | Y | -0.09 | -0.52 | -1.00 | 0.14  | 1.03  | 0.90  | 0.89  | 0.16  | 0.63   | 0.94  | -2.72 | -2.49 | -1.88 | -1.75 |
|                              |   | Z | -0.04 | -0.07 | -0.14 | -0.04 | -0.07 | 0.06  | 0.07  | -0.08 | -0.27  | -0.37 | 2.32  | 1.94  | 1.40  | 1.28  |
|                              | 5 | X | -0.02 | -0.03 | 0.11  | 1.44  | 1.27  | 1.16  | 1.14  | 0.54  | 2.05   | -1.09 | 2.29  | 2.20  | 1.99  | 1.84  |
|                              |   | Y | -0.09 | -0.53 | 0.37  | 1.14  | 1.14  | 1.11  | 1.09  | 0.22  | 0.52   | -0.55 | -6.02 | -5.13 | -4.64 | -4.51 |
|                              |   | Z | -0.03 | -0.06 | -0.11 | -0.29 | -0.30 | -0.34 | -0.34 | -0.39 | -0.53  | 0.90  | 23.13 | 19.52 | 17.33 | 16.70 |
|                              |   | X | -0.03 | 0.20  | 0.32  | 1.24  | 1.21  | 1.18  | 1.17  | 0.23  | -3.78  | -2.99 | -4.45 | -5.16 | -4.84 | -4.66 |
|                              | 6 | Y | -0.10 | 0.68  | 1.46  | 1.06  | 1.05  | 1.02  | 1.00  | 0.23  | -0.72  | -0.89 | -5.04 | -4.79 | -4.52 | -4.35 |
|                              |   | Z | -0.04 | -0.23 | -0.48 | -0.39 | -0.38 | -0.38 | -0.36 | 0.27  | 0.03   | 0.62  | -4.25 | -4.02 | -3.79 | -3.64 |
|                              | 7 | X | 0.22  | 0.29  | -0.07 | 0.53  | 0.61  | 0.62  | 0.61  | -6.87 | -11.52 | -9.72 | -8.35 | -8.37 | -8.39 | -8.41 |
|                              |   | Y | 1.13  | 1.96  | 1.66  | 1.31  | 1.30  | 1.30  | 1.31  | -1.80 | -2.24  | -0.81 | -4.77 | -5.07 | -5.06 | -5.01 |
|                              |   | Z | -0.44 | -0.85 | -0.88 | -0.89 | -0.92 | -0.92 | -0.92 | -0.03 | 0.29   | 0.63  | -0.97 | -1.09 | -1.08 | -1.06 |
| Class II<br>elastic<br>group | 1 | X | -0.02 | -0.04 | -0.08 | -0.06 | -0.30 | -0.16 | -0.54 | 0.77  | 3.12   | 6.26  | 8.50  | 9.27  | 4.68  | 0.50  |
|                              |   | Y | -0.11 | -0.58 | -1.22 | -1.54 | -1.82 | -0.98 | 1.16  | 0.01  | -0.13  | -0.34 | -1.34 | -0.18 | -0.47 | 1.70  |
|                              |   | Z | -0.12 | -0.50 | -1.12 | -1.71 | -1.87 | -1.19 | -1.06 | -0.04 | -0.11  | -0.20 | 0.21  | -0.24 | 0.14  | 0.40  |
|                              | 2 | X | -0.02 | -0.05 | -0.10 | 0.42  | 0.28  | 0.47  | -0.41 | 0.70  | 2.86   | 5.55  | 6.32  | 7.50  | 3.26  | -2.25 |
|                              |   | Y | -0.11 | -0.56 | -1.16 | -1.01 | -1.41 | -0.63 | 1.79  | -0.05 | -0.11  | -0.18 | -2.80 | -2.22 | -2.19 | 0.19  |
|                              |   | Z | -0.10 | -0.41 | -0.90 | -0.99 | -1.08 | -0.58 | -0.37 | -0.03 | -0.15  | -0.31 | 0.85  | 0.50  | 0.88  | 0.54  |
|                              | 3 | X | -0.01 | -0.07 | -0.22 | -0.48 | -0.57 | -0.49 | -0.48 | 0.60  | 2.71   | 5.20  | 3.71  | 1.94  | -0.09 | 0.15  |
|                              |   | Y | -0.07 | -0.47 | -1.04 | -0.70 | -0.06 | 0.74  | 0.76  | 0.03  | 0.45   | 1.38  | 2.33  | 3.07  | 2.64  | 2.47  |
|                              |   | Z | -0.07 | -0.22 | -0.44 | -0.57 | -0.52 | -0.49 | -0.50 | -0.09 | -0.60  | -1.39 | -2.27 | -2.29 | -1.71 | -1.64 |

|   |   |       |       |       |       |       |       |       |       |        |       |       |       |       |       |
|---|---|-------|-------|-------|-------|-------|-------|-------|-------|--------|-------|-------|-------|-------|-------|
| 4 | X | -0.02 | -0.08 | -0.23 | 0.35  | 0.38  | 0.29  | 0.28  | 0.82  | 2.85   | 4.11  | 0.07  | -4.00 | -3.53 | -3.37 |
|   | Y | -0.13 | -0.58 | -1.02 | -0.19 | 0.66  | 0.60  | 0.61  | 0.23  | 0.73   | 0.84  | -2.88 | -2.99 | -2.51 | -2.39 |
|   | Z | -0.05 | -0.08 | -0.16 | -0.14 | -0.28 | -0.29 | -0.29 | -0.12 | -0.33  | -0.27 | 2.63  | 2.25  | 1.86  | 1.76  |
| 5 | X | -0.04 | -0.07 | 0.05  | 0.54  | 0.48  | 0.42  | 0.40  | 0.71  | 2.82   | 0.15  | 5.01  | 4.72  | 4.45  | 4.33  |
|   | Y | -0.13 | -0.54 | 0.17  | 0.66  | 0.63  | 0.60  | 0.59  | 0.32  | 0.80   | -0.04 | -2.64 | -1.90 | -1.51 | -1.37 |
|   | Z | -0.04 | -0.06 | -0.09 | -0.29 | -0.31 | -0.30 | -0.30 | -0.59 | -0.98  | -0.46 | 9.52  | 8.17  | 7.59  | 7.38  |
| 6 | X | -0.06 | 0.13  | 0.26  | 0.59  | 0.62  | 0.60  | 0.59  | 0.38  | -3.53  | -3.42 | -5.71 | -6.04 | -5.68 | -5.50 |
|   | Y | -0.14 | 0.61  | 1.34  | 1.02  | 0.96  | 0.94  | 0.93  | 0.34  | -0.55  | -0.82 | -2.40 | -1.33 | -0.82 | -0.54 |
|   | Z | -0.04 | -0.21 | -0.46 | -0.34 | -0.28 | -0.27 | -0.26 | 0.39  | 0.18   | 0.60  | -1.60 | -0.47 | 0.08  | 0.37  |
| 7 | X | 0.19  | 0.15  | -0.08 | 0.31  | 0.31  | 0.30  | 0.27  | -6.66 | -11.15 | -9.16 | -7.12 | -7.27 | -7.39 | -7.51 |
|   | Y | 1.09  | 1.91  | 1.62  | 1.30  | 1.25  | 1.25  | 1.25  | -1.65 | -2.06  | -0.79 | -1.94 | -1.73 | -1.45 | -1.18 |
|   | Z | -0.42 | -0.81 | -0.83 | -0.85 | -0.87 | -0.88 | -0.88 | 0.01  | 0.32   | 0.58  | -0.40 | -0.33 | -0.24 | -0.15 |

---
